# Supplementary material for: Effects of 4-week velocity-based HIIT on athletic performance in youth soccer players
Source: PeerJ. 2025 Sep 23;13:e20066. doi: 10.7717/peerj.20066 (PMC12466504; doi:10.7717/peerj.20066)
Supplement: Supplemental Information 1 — cod_1 (Pre-test), cod_2 (Post-test) – Change of Direction (COD) test results in the pretest and postest ıft_1 (Pre-test), ıft_2 (Post-test) – Intermittent Fitness Test (IFT) results in the pretest and postest vo2_1 (Pre-test), vo2_2 (Post-test) – VO₂ max (maximum oxygen consumption) measurements in the pretest and postest [file peerj-13-20066-s001.xlsx]

## Sheet: MAS.jasp
grup	age	height	bodymass	bmi	sportsage	maximumSprint Speed	maximumSprint Speed2	cod_1	cod_2	ıft_1	ıft_2	vo2_1	vo2_2
1	18	1.92	82	22.24	8	24.06	25.19	5.32	5.14	18	19	47.41	49.5
1	19	1.91	84	23.03	8	25.35	26.8	5.13	5.06	18	19	47.65	49.8
1	20	1.89	82	22.96	10	25.12	25.96	5.41	5.3	18.5	19.5	48.04	51.34
1	20	1.72	70	23.66	8	24.82	25.21	5.39	5.29	19.5	20.5	50.67	53.97
1	20	1.71	70	23.94	7	26.12	26.41	5.41	5.33	18	19	48.47	50.67
1	18	1.88	73	20.65	8	25.17	26.6	5.69	5.55	19	20	49.82	51.9
1	19	1.74	70	23.12	7	25	26.12	5.58	5.48	18	18.5	48.15	49.22
2	20	1.74	74	24.44	8	25.53	25.65	5.43	5.41	18	18	48.32	48.32
2	17	1.76	73	23.57	10	24.22	24.49	5.55	5.56	18	18	47.42	47.42
2	18	1.77	73	23.3	8	24.11	24.43	5.5	5.5	19	19	49.82	49.82
2	19	1.8	76	23.46	9	25.35	25.35	5.42	5.43	18.5	18.5	49.01	49.01
2	20	1.83	79	23.59	11	25.12	25.12	5.39	5.4	19	19.5	50.35	51.45
2	19	1.92	84	22.79	9	24.83	24.83	5.38	5.36	17.5	18	46.58	47.65
2	18	1.86	81	23.41	8	25.96	25.9	5.32	5.31	18	18.5	47.45	48.49
cod_1 (Pre-test), cod_2 (Post-test) – Change of Direction (COD) test results in the pretest and postest
ıft_1 (Pre-test), ıft_2 (Post-test) – Intermittent Fitness Test (IFT) results in the pretest and postest
vo2_1 (Pre-test), vo2_2 (Post-test) – VO₂ max (maximum oxygen consumption) measurements in the pretest and postest
